# Supplementary material
Source: PubMed Central journal article supplement (PMC4805881)
Supplement: mmc2.pdf [file mmc2.pdf]

## Article

## Diffusion of Bacterial Cells in Porous Media

Nicholas A. Licata,<sup>1,3</sup> Bitan Mohari,<sup>2</sup> Clay Fuqua,<sup>2</sup> and Sima Setayeshgar<sup>1,\*</sup><sup>1</sup>Department of Physics and <sup>2</sup>Department of Biology, Indiana University, Bloomington, Indiana; and <sup>3</sup>Department of Natural Sciences, University of Michigan-Dearborn, Dearborn, Michigan

**ABSTRACT** The chemotaxis signal transduction network regulates the biased random walk of many bacteria in favorable directions and away from harmful ones through modulating the frequency of directional reorientations. In mutants of diverse bacteria lacking the chemotaxis response, migration in classic motility agar, which constitutes a fluid-filled porous medium, is compromised; straight-swimming cells unable to tumble become trapped within the agar matrix. Spontaneous mutations that restore spreading have been previously observed in the enteric bacterium *Escherichia coli*, and recent work in other bacterial species has isolated and quantified different classes of nonchemotacting mutants exhibiting the same spreading phenotype. We present a theoretical description of bacterial diffusion in a porous medium—the natural habitat for many cell types—which elucidates how diverse modifications of the motility apparatus resulting in a nonzero tumbling frequency allows for unjamming of otherwise straight-swimming cells at internal boundaries and leads to net migration. A unique result of our analysis is increasing diffusive spread with increasing tumbling frequency in the small pore limit, consistent with earlier experimental observations but not captured by previous models. Our theoretical results, combined with a simple model of bacterial diffusion and growth in agar, are compared with our experimental measurements of swim ring expansion as a function of time, demonstrating good quantitative agreement. Our results suggest that the details of the cellular tumbling process may be adapted to enable bacteria to propagate efficiently through complex environments. For engineered, self-propelled microswimmers that navigate via alternating straight runs and changes in direction, these results suggest an optimal reorientation strategy for efficient migration in a porous environment with a given microarchitecture.

## INTRODUCTION

Fluid-filled porous media—environments such as soil, tissue, or a biofilm matrix—constitute the natural habitat for many bacterial cell types. Flagella are used by more than 80% of bacteria to swim through fluid media (1). In many cases, the strategy used by motile bacteria to explore their local environment consists of relatively straight-swimming intervals punctuated by random changes in direction, described by a random walk. Even when moving in a preferred direction in response to chemical environmental stimuli, there is a random component to the bacterial trajectory. The frequency of random directional changes is suppressed along favorable directions by a chemosensory network, resulting in a biased random walk. These changes in direction, governed by flagellar dynamics, play a crucial role in bacterial migration in porous media, allowing cells to clear obstacles. It is conceivable that details of bacterial sensing and motility determining the biased random walk trajectory can be adapted to the microarchitecture of a given environment to enhance spreading, with relevance to the evolution of these mechanisms in microorganisms (2,3) as well as their application to artificial microswimmers (4).

In this work, we present a theoretical description of bacterial diffusion in a porous environment, elucidating its dependence on details of bacterial motility, through the frequency and degree of directional reorientations, and the mean pore size of the medium. The presentation is organized as follows. In the context of flagellar motility, bacterial chemosensing, and diffusion, first we describe the experimental motivation for our analysis, namely the emergence of spontaneous motility mutations that allow diffusive expansion of bacterial colonies in porous agar by restoring reorientations in straight-swimming parent strains (5,6). We describe how incorporating bacterial idling at internal boundaries leads to a new microscopic description, to our knowledge, of bacterial diffusion in a porous medium. Our theoretical results are consistent with previous experimental observations in soft agar of the nonspreading phenotype of straight-swimming mutants, and the perhaps counterintuitive trend that the diffusive spread of cells increases with increasing tumbling frequency, both features not captured by previous models. We make a connection between the spontaneous motility mutations that restore diffusive migration and existing computational results on flagellar dynamics governing swimming and reorientations. We compare our theoretical results with fits with our measurement of the diffusive spread of mutants in motility agar assays, and we conclude

---

Submitted April 16, 2015, and accepted for publication September 30, 2015.

\*Correspondence: [simas@indiana.edu](mailto:simas@indiana.edu)

Editor: Charles Wolgemuth

© 2016 by the Biophysical Society

0006-3495/16/01/0247/11

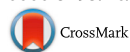

---

<http://dx.doi.org/10.1016/j.bpj.2015.09.035>

with implications for optimization of the swimming strategy of microswimmers in porous habitats.

### Flagellar motility, bacterial chemotaxis, and diffusion

In multiflagellated cells, straight-swimming motion and directional reorientations are governed by collective flagellar dynamics, through flagellar bundling and unbundling, respectively. Flagella are helical extracellular filaments connected via a flexible curved segment, called the hook, to the basal body and powered by a rotary motor complex (7,8). The best-studied motility paradigm, shared by other well-studied bacteria, is that of *Escherichia coli* (*E. coli*), where multiple-rotating flagella form a bundle that acts as a propeller to drive the cell forward. In *E. coli*, counterclockwise (CCW) flagellar rotation promotes bundle formation, leading to intervals of straight swimming, called runs. Clockwise (CW) rotation of one or more flagella leads to bundle disruption and results in reorientation of the cell's motion, known as tumbles. In other bacterial species with unidirectional motors, unbundling occurs when one or more flagella slow or stop their rate of rotation (9–11). The dynamics of unbundling determine the extent to which the cell is reoriented during a tumble. The biophysical mechanisms underlying bundling, unbundling, and reorientation, which necessarily depend on properties of both intracellular and extracellular components of the motility apparatus, are the subject of ongoing experimental and computational studies (12–18).

Rotation of the flagellar motor is modulated by the output of the chemotaxis network, the phosphorylated form of the intracellular response regulator, CheY (CheY-P). In this sensory network, consisting of multiple (Che) proteins, the binding of a chemical signal to receptor clusters in the cytoplasmic membrane triggers a complex internal signaling pathway (19), culminating in a change in the concentration of CheY-P. In turn, the binding of CheY-P to the FliM protein in the FliM-FliG-FliN flagellar motor switch complex induces tumbling, which in the *E. coli* motility paradigm is achieved through increasing the CW rotational bias. Recent work has highlighted the fact that the flagellar motor assembly itself is a dynamic structure, with protein components exchanging between the working motor and cytoplasmic pools in response to intra- and extracellular signals (20–24).

These chemical kinetic events and resulting conformational changes of the motor complex are subject to noise, and as such, the generation of tumbles is an inherently stochastic process. In the absence of an external gradient, the trajectory of a cell is characterized by a random walk of alternating runs and tumbles (19,25), namely diffusion. The chemotaxis signaling network, through changes in CheY-P concentration in response to external gradients, serves to bias this random walk toward (away from) favorable (harmful) directions.

Diffusion of bacterial cells as active particles is fundamentally different from that (because of the thermal energy) of inanimate gaseous particles. In the latter case, particle-particle or particle-boundary collisions randomize the trajectory, whereas for bacteria, tumbles are generated intrinsically by each cell's motility apparatus. Furthermore, bacteria encountering an internal or external boundary are not reflected as in the collision of a hard sphere with a hard boundary; rather, a cell idles at a boundary until the next tumble reorients it. The main result of this study is that in porous media, especially in the small pore regime, this distinction becomes central; consequently, the diffusion constant characterizing the random motion of a bacterial cell is different from that obtained in analogy with a gas particle.

### Pseudotaxis

An important assay medium for studying swimming motility over the past few decades has been semi-solid agar, which is a low concentration, high-porosity fluid-filled random network of agarose polymers (26–29). Bacteria are inoculated at a single point and the radial spread of the population, known as the swim ring or disc, is measured over time. As bacteria metabolize nutrients locally, a chemical gradient is established, and in addition to bacterial diffusion, chemotaxis enhances the outward radial migration of cells toward higher nutrient concentrations. A wide variety of chemotaxis mutants have been identified and assayed in motility agar. For example, tumbling frequency is significantly decreased in *cheA* mutants (disabled for the kinase that phosphorylates the CheY response regulator) with respect to wild-type, leading to relatively straight, uninterrupted runs. Consequently, these mutants do not advance appreciably, becoming trapped in the agar network. Likewise, in *cheB* mutants (disabled for a methyltransferase enzyme involved in the adaptation phenomenon) with increased tumbling, advancement of the swim ring is also diminished with respect to wild-type as these cells change direction so frequently that their net movement is compromised. In both cases, decoupling the mean runtime from Che control abolishes the ability to bias movement in response to gradients (30–34).

Wolfe and Berg (5) showed that in motility agar assays of *E. coli che* deletion strains, spontaneous mutations arose that restored the radial expansion of the population, appearing to overcome the chemotaxis deficiency. These mutants were found to have point mutations in the *fliM* and *fliG* genes that encode components of the flagellar switch complex, leading to flagellar rotation reversals in contrast with the straight-swimming parent strain. However, although the chemotaxis network normally modulates the frequency of motor reversals in response to external chemical queues (30,35,36), in these mutants the switching is random. The resulting effective migration of nonchemotactic mutants in porous agar, termed pseudotaxis by others (36,37),

is therefore a purely diffusive spread of motile bacteria that are not able to respond to chemical gradients. (The migration of these spontaneous mutants in agar as a result of regaining the ability to generate tumbles via various motility defects is not to be confused with pseudochemotaxis. Pseudochemotaxis, proposed by Lapidus (38), refers to apparent chemotaxis, or motion in the direction of increasing chemoattractant concentration, when the diffusion constant is itself a function of the chemoattractant concentration.) Also of relevance, Stock et al. (39) reported the spreading of *cheR cheB* double mutants in agar assays, incorrectly inferring that the migration of these transferase-esterase double mutants, which exhibit both runs and tumbles, was because of chemotaxis. Wolfe and Berg (5) showed that their migration rate increases with tumbling frequency, and Berg and Turner (40) demonstrated definitively in capillary assays that this strain was in fact nonchemotactic.

Related work (41) on mutants of the plant pathogen *Agrobacterium tumefaciens* (*A. tumefaciens*), in which the *cheA* chemotaxis regulator or the entire *che* gene cluster was deleted, led to the isolation of chemotaxis mutation suppressor (*cms*) mutants that were similarly able to rescue the decreased migration of the straight-swimming phenotype parent strain. It was shown that these *cms* mutants were indeed able to tumble in suspension.

In *A. tumefaciens*, up to six flagella are organized as a polar tuft (42). In contrast to *E. coli* and as with other related members of the *Rhizobiaceae* family, it is believed that *A. tumefaciens* is propelled forward during runs by CW flagellar rotation resulting in bundle formation (10,43,44). The slowing of the CW rotation rate of the flagellar motor, rather than the reversal of the direction of rotation, is thought to initiate tumbles (11,45), presumably causing disruption of the flagellar bundle. The mechanistic differences in the generation of tumbles suggested that *cms* mutations resulting in pseudotaxis in *A. tumefaciens* might be different from those observed in *E. coli*.

Indeed, recent work quantifying a collection of *A. tumefaciens cms* mutants using whole genome resequencing to map their mutations has identified novel mutations that affect the structure of the flagellum and the process by which its rotation is powered (6). Three classes of mutations were discovered. Class I mutations were mapped to the (D1 domain of the) flagellar hook protein, FlgE. Class II mutations were found to extend the *fliK* coding sequence and are predicted to produce a longer FliK protein; while motile, these mutants produced coiled and polyhook filaments, consistent with the role of FliK as the flagellar hook length regulator (46). Class III mutations corresponded to the flagellar motor protein MotA involved in torque generation (11). Single-cell tracking studies have directly confirmed that these mutations restore changes in direction in the straight-swimming trajectories of the parent strain.

Motivated by these experimental observations, we have developed a theoretical description of bacterial diffusion

in porous media. Our analysis unifies the phenomenology of diverse mutations in the motility apparatus of various bacterial species that compromise flagellar bundling in different ways. It quantifies how effective tumbling, or directional change, leads to diffusive migration in porous agar in an otherwise straight-swimming background strain. The emergence of these spontaneous mutations in a chemotaxis deletion background provides a unique setting in which to separate the chemotaxis response from the purely diffusive spread of bacterial cells in motility agar assays. At the heart of our analysis is the fact that bacterial diffusion arises from the inherently stochastic generation of tumbles by individual cells, in contrast with gaseous diffusion where reorientations result from particle-particle and particle-boundary collisions. Indeed, as directly observed in Wolfe and Berg's work (5), and depicted schematically in Fig. 1, cells idle at internal boundaries until reoriented by a new tumble. Absent these unique mutant classes, previous theoretical works quantifying bacterial migration in agar and other porous media have necessarily also addressed chemotaxis, making this distinction less apparent.

## MATERIAL AND METHODS

For motility assays in swim agar fresh colonies of bacteria were streaked out and used to inoculate the plates. Expansion of the swim ring was measured as a function of incubation time. The strains used were the wild-type *A. tumefaciens*, the parent mutant  $\Delta che$ , and one representative mutant from each class of *cms* mutants: class I (*flgE*), class II (*fliK*), and class III (*motA*). *A. tumefaciens* (AT) is typically grown in AT minimal medium (47) supplemented with 0.5% (wt/vol) glucose and 15 mM ammonium sulfate (ATGN). Microbiological media were obtained from Fisher Scientific (Pittsburg, PA) and Sigma-Aldrich (St. Louis, MO). For the preparation of ATGN motility agar plates (agar concentration,  $C = 0.25\%$ ), 100 mm petri dishes with 20 ml of Bacto agar (BD, Sparks, MD) were used. A toothpick was used to inoculate colonies by stabbing them into the agar at the center of the plate. Following inoculation, the plates were incubated at 28°C for up to 7 days, with swim ring diameters measured daily.

## RESULTS

Below, we first derive the diffusion constant for a bacterial cell as a function of the properties of the cell—cell speed, steady-state tumbling frequency, and tumble angle distribution—and that of the porous medium, characterized by the average pore size. Given the importance of tumbling, we then make connection between previous computational results on the biophysical mechanisms underlying flagellar bundling and unbinding and the experimentally identified mutations in the motility apparatus of strains exhibiting pseudotaxis. Finally, we compare the theoretical results for diffusion in agar with experimental measurements of the expansion of the swim disc for various mutant classes. In the subsequent sections, we summarize our results and comment on their broader implications for optimizing the propagation of self-propelled particles in porous habitats.

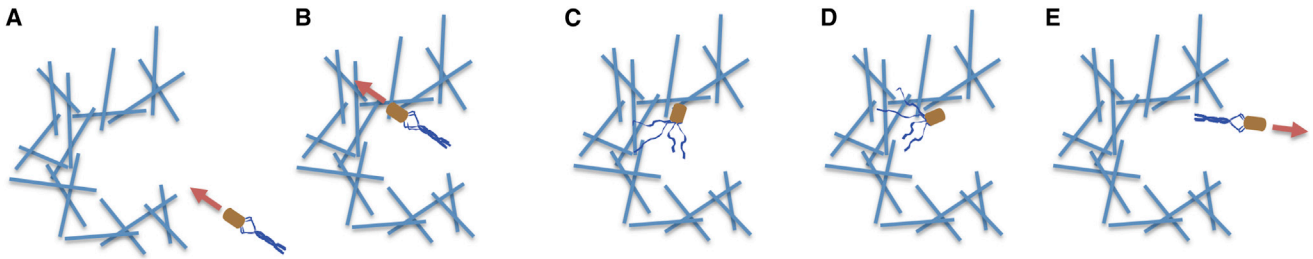

FIGURE 1 Idealized schematic model of migration through the motility agar matrix. Although straight-swimming cells can be trapped in the agar matrix and idle, tumbles generated via a variety of mechanisms that alter flagellar bundling enable the unjamming of cells at internal boundaries and net migration through the porous medium. In wild-type cells, tumbles are under the control of the chemotaxis sensory network, whereas in the *cms* mutants lacking the chemotactic response, erratic swimming motion and random directional changes are caused by mutations in the motility apparatus. The panels schematically illustrate how a straight-swimming cell (A) can encounter an agar matrix barrier and idle (B), until a tumble occurs (C) causing reorientation (D), and allowing the cell to become unjammed and swim away (E). The arrows denote the run direction.

### Bacterial random walk in porous media

For a particle diffusing isotropically in three dimensions, the mean square displacement  $\langle r^2(t) \rangle$  traveled in a time  $t$  is the following:

$$\langle r^2(t) \rangle \approx 6Dt, \quad (1)$$

where  $D$  is the diffusion coefficient. Lovely and Dahlquist provided a framework for formulating statistical measures of bacterial motility in terms of a random walk model of a polymer chain (48), with each run representing a bond and each tumble a vertex at which a bond angle between successive bonds (runs) can be defined. We assume that tumbles are described as a homogeneous Poisson process; hence, the distribution of run-times,  $\tau$ , is exponential with a characteristic tumbling frequency (rate at which tumbles occur),  $\omega$ , as in the following:

$$R(\tau) = \omega \exp(-\omega\tau). \quad (2)$$

Assuming variable uncorrelated bond lengths,  $\ell = v\tau$ , and bond angles,  $\theta$ , it can be shown that

$$D = \frac{\langle \ell^2 \rangle}{6T(1-\alpha)} \left[ 1 + \left( 2 \frac{\langle \ell \rangle^2}{\langle \ell^2 \rangle} - 1 \right) \alpha \right], \quad (3)$$

where  $\langle \ell \rangle$  and  $\langle \ell^2 \rangle$ , are the mean run length and mean-squared run length, respectively,  $T = \langle \tau \rangle = 1/\omega$  is the mean run-time, and  $\alpha = \langle \cos\theta \rangle$  is the mean projection of adjacent bonds. This is achieved by equating the mean-squared displacement of a cell in its random walk trajectory to the mean end-to-end distance of an  $N$ -link polymer chain with variable uncorrelated bond lengths and angles, and interpreting  $N$  as  $t / \langle \tau \rangle$  (48,49).

Extending this framework to diffusion in a homogeneous porous medium, characterized by an average pore size,  $a$ , we consider how the statistics of runs and tumbles are modified with respect to that in bulk. First, we note that the tumbling frequency,  $\omega$ , remains unchanged. Indeed, collisions with the pore walls do not result in increased tumbling fre-

quency; unlike gaseous particles in a confined geometry, bacteria do not reflect off of boundaries. This frequency is a property of the active particle and is determined by the parameters of the intracellular chemotaxis network and motor response, independent of the geometry of the external medium. Rather, we assume that a running bacterium that encounters a boundary wall remains trapped, idling until a tumble reorients it, as directly observed by Wolfe and Berg (5) in studying the motion of individual cells in agar. In this way, the mean run length is modified, according to the following:

$$\langle \ell \rangle = \int_0^\infty R(\tau) [v\tau u(a - v\tau) + a u(v\tau - a)] d\tau, \quad (4)$$

where the unit step function  $u(t)$  is defined as  $u(t) = 0$  for  $t < 0$  and  $u(t) = 1$  for  $t \geq 0$ . We find that

$$\langle \ell \rangle = \frac{v}{\omega} (1 - e^{-x}), \quad (5)$$

and

$$\langle \ell^2 \rangle = \frac{2v^2}{\omega^2} [1 - (1+x)e^{-x}], \quad (6)$$

with the dimensionless parameter,  $x = \omega a/v$ . Hence, the diffusion coefficient becomes the following:

$$D = \frac{va}{3(1-\alpha)} \frac{1}{x} [1 - (1+x)e^{-x} + \alpha e^{-x}(e^{-x} - 1 + x)]. \quad (7)$$

Previous works on diffusion of bacterial cells in confined spaces (50–54) have adopted a kinetic gas approach, assuming bacteria behave as diffusing gaseous particles, and collisions with boundary walls are equivalent to hard particle-particle collisions. Of direct relevance, work on migration of chemotactic bacteria in soft agar (55) has addressed the role of gel concentration on the chemotactic sensitivity and diffusivity of cells, also treating the tumbling rate as being enhanced because of collisions with the agar matrix. Other

related works (56,57) consider general strategies for chemotaxis as a biased random walk, highlighting the fact that different assumptions about the microscopic details of the random walk process give rise to distinct diffusion equations.

For a gas diffusing in a capillary tube, Pollard and Present (58) derive a rigorous solution, which in the low pressure limit is in agreement with the Knudsen result (59), where momentum transfer takes place predominantly in collisions with the tube walls. The high pressure limit of their result yields the expected self-diffusion coefficient from kinetic theory. Their result is consistent with the analysis from Bosanquet (58), where the random walk trajectory of a molecule in a tube is terminated either by collisions with other molecules or with the tube wall, and the frequencies of the two types of collisions are taken to be additive. In terms of the mean free paths associated with particle-particle and particle-wall collisions,  $\langle \ell_g \rangle$  and  $\langle \ell_w \rangle$ , respectively, the frequencies are related as follows:

$$v/\langle \ell \rangle = v/\langle \ell_g \rangle + v/\langle \ell_w \rangle. \quad (8)$$

The diffusion constants associated with each of these steps are assumed to be proportional to  $v$  times the mean step size as follows:

$$1/D = 1/D_g + 1/D_w, \quad (9)$$

where  $D_g = \langle \ell_g \rangle v/3$  and  $D_w = \langle \ell_w \rangle v/3 = av/3$ ;  $a$  is the capillary diameter; and  $D_g$  and  $D_w$  correspond to the high and low pressure limits, respectively. An important distinction between our analysis and previous work on bacterial motion in porous media based on this description is that cell-boundary interactions are not treated as hard sphere-hard wall collisions; rather, a running cell idles at an obstacle until the next tumble reorients it.

To highlight this distinction, it is informative to consider limiting cases of our general result (Eq. 7). In the limit of large pore size ( $a \gg v/\omega$ ), we find that the diffusion constant approaches the value in the bulk is the following:

$$D = \frac{1}{3(1-\alpha)} \frac{v^2}{\omega} = \frac{1}{3(1-\alpha)} v \langle \ell \rangle. \quad (10)$$

In the limit of small pore size ( $a \ll v/\omega$ ), it becomes the following:

$$D = \frac{1}{6} \frac{(1+\alpha)}{1-\alpha} \omega a^2, \quad (11)$$

which differs from the Knudsen limit,  $D_K = av/3$  for a kinetic gas at low pressure (52). For a bacterium, the mean squared displacement in this limit,  $a^2$ , occurs during a time  $1/\omega$ , rather than  $a/v$  ( $\ll 1/\omega$ ), because it remains idling at the boundary until a new tumble. We note that because the Knudsen limit is independent of tumbling frequency, it does not capture the response of the  $\Delta che$  strain in agar assays.

Were it a correct description of bacterial diffusion in confined geometries, straight-swimming strains would spread in agar assays with  $D \sim 10-50 \mu\text{m}^2\text{s}^{-1}$  for  $a \sim 1-5 \mu\text{m}$  and  $v \sim 30 \mu\text{m/s}$ . On the contrary, for chemotaxis gutted mutants of various bacterial species, there is very little expansion of the swim ring with time, because straight swimmers unable to tumble remain obstructed in pores.

This linearly increasing functional dependence of the diffusion constant on the tumbling frequency in the small pore limit (with other dependences, namely the tumble angle distribution and directional persistence, held fixed) is a unique prediction of our model, not captured by other theoretical descriptions of bacterial diffusion in porous media. (Of direct relevance, in Croze et al. (55), the diffusion constant in agar is inversely proportional to the effective tumbling frequency,  $\omega_{eff}$ , which is taken to be a product of the intrinsic tumbling frequency,  $\omega$ , and a phenomenologically imposed function of the agar gel concentration,  $C$ , given by  $\omega_{eff} = \omega(1+f(C))$ , where by ansatz,  $f(C) = \exp[(C-C_1)/C_0]$ , and  $C_1, C_0$  are constants. This result has the correct limiting behavior for the nonspreading phenotype of hypertumbling mutants with large intrinsic tumbling frequency, and captures the divergence of the diffusion constant in bulk for chemotaxis-deficient cells with zero intrinsic tumbling frequency. However, it also diverges for straight-swimming cells in the porous environment of agar assays, where in fact there is no diffusive spread. Correspondingly, the trend predicted in agar assays with increasing intrinsic tumbling frequency would be that of decreasing migration rate, in contrast with the observed trend for small tumbling frequencies (5).)

Our theoretical result is qualitatively supported by Wolfe and Berg's (5) observation of increasing migration rate with increasing isopropyl-beta-D-thiogalactopyranoside concentration in the chemotaxis gutted strain with CheY expression under control of the lactose promoter. Wolfe and Berg showed that the fraction of time tethered cells of this strain spun clockwise increased with increasing isopropyl-beta-D-thiogalactopyranoside concentration, as did the fraction of time that cells tumbled, and thereby concluded that the migration rate increased with increasing tumbling frequency. Although below we make connection between the small pore limit of our theoretical result and diffusion constants inferred from measurements of swim ring expansion rates of *cms* mutants, similar experiments to those of Wolfe and Berg probing diffusion of bacterial cells in agar assays at successively increasing tumbling frequencies are required to quantitatively establish the linear dependence predicted by Eq. 11.

Considering limits of our general result in terms of the tumbling frequency, the hypertumbling phenotype is obtained for  $x = \omega a/v \gg 1$ , given by Eq. 10, leading to  $D \rightarrow 0$  as  $\omega \rightarrow \infty$ ; this limit is satisfied by incessantly tumbling cells ( $\omega \rightarrow \infty$ ) for finite pore size,  $a$ , as well as in bulk where  $a \rightarrow \infty$ . The smooth-swimming phenotype is described separately in the large pore limit by Eq. 10

( $x = \omega v/a \gg 1$ , obtained by requiring  $a \rightarrow \infty$  faster than  $v/\omega \rightarrow \infty$  as  $\omega \rightarrow 0$ ), and in the small pore size limit by Eq. 11 ( $x = \omega v/a \ll 1$  obtained for  $\omega \ll v/a$ ). Hence, in the large pore or bulk limit, for smooth-swimming cells  $D \rightarrow \infty$  as  $\omega \rightarrow 0$ , as expected for cells that do not tumble in bulk, whereas in the small pore limit,  $D \rightarrow 0$  as  $\omega \rightarrow 0$ , also as expected for cells trapped in agar.

With the direction of cell movement given by  $+\hat{z}$ , we introduce the tumble angle distribution  $W(\theta)$  where  $\theta$  is the polar angle. For *E. coli* it has been measured in bulk fluid (60) and is well approximated by  $W(\theta) = (1/2)(1+\cos\theta)$  (61), giving the following:

$$\alpha = \langle \cos\theta \rangle = \int_0^\pi W(\theta) \sin\theta \cos\theta d\theta = 1/3. \quad (12)$$

As measured for *Pseudomonas putida*,  $W(\theta) = (1/16)(3 + 15\cos^2\theta)$ , giving  $\alpha = 0$  (53). For concreteness, we use these values obtained from measured distributions in bulk to examine the dependence of  $D$  on other governing physical parameters, given by  $a$ ,  $v$ , and  $\omega$ . However, we note that in confined geometries, interference of the bacterial turning mechanism with geometrical constraints could give rise to a different tumble angle distribution with respect to that in bulk, and steric inhibition at internal obstacles may further modify the directional persistence,  $\alpha$ , with respect to its bulk value. In the Supporting Material, we discuss the dependence of  $D$  on  $\alpha$  and refinements to the derivation of the diffusion constant, accounting for steric inhibition at collisions are presented.

In Fig. 2, the dependence of  $D$  on  $\omega$  and  $a$  is plotted for  $v = 30 \mu\text{ms}^{-1}$  and  $\alpha = 1/3$ . This figure shows a maximum in the diffusion coefficient, realized when the bacterium runs until almost reaching a boundary, but tumbles before idling, corresponding to  $x = \omega a/v \sim 1$ . As discussed above, as  $\omega \rightarrow 0$ ,  $D$  vanishes as expected given the nonexpanding phenotype of straight-swimming strains trapped in pores,

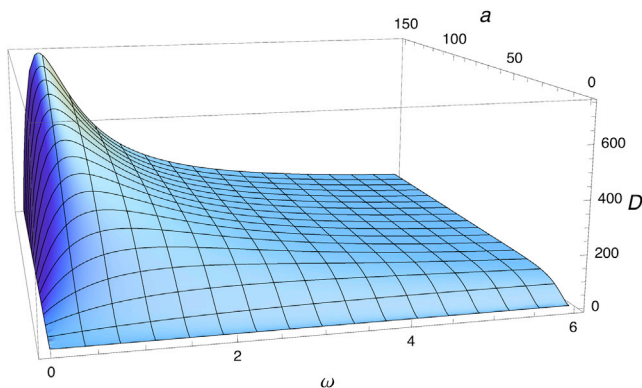

FIGURE 2 The diffusion coefficient  $D$  (in units of  $\mu\text{m}^2\text{s}^{-1}$ ), as given by Eq. 7, as a function of  $\omega$  (in units of  $\text{s}^{-1}$ ) and  $a$  (in units of  $\mu\text{m}$ ) for fixed  $v = 30 \mu\text{ms}^{-1}$  and  $\alpha = 1/3$ . For free diffusion in bulk fluid, bacterial diffusion constants are  $\sim 200$  to  $1900 \mu\text{m}^2\text{s}^{-1}$  (25,52).

and as  $\omega \rightarrow \infty$ ,  $D$  approaches zero as expected for hypertumbly cells that also do not advance appreciably. Finally,  $D$  approaches the value in bulk fluid (which depends on  $\omega$ ) as  $a$  increases. In the Supporting Material, we plot a similar dependence of  $D$  on  $\omega$  and  $v$  at fixed  $a$ .

### Connection between diffusion, tumbling, and motility defects in *A. tumefaciens cms* mutants

Our theoretical model of bacterial diffusion in a porous environment demonstrates how spontaneous mutations that restore tumbling in otherwise straight-swimming parent strains lead to diffusive spread in agar assays. Indeed, in Fig. 3, A–E, we show results of single-cell, two-dimensional tracking studies of *A. tumefaciens* in bulk fluid for wild-type, chemotaxis deficient ( $\Delta che$ ), class I (FlgE mutation), class II (FliK mutation), and class III (MotA mutation) cell types, directly demonstrating that class I to III mutations restore reorientations (see Mohari et al. (6), for details of tracking analysis). Given that the motility paradigm shared by *A. tumefaciens* and related species is less well characterized than that of *E. coli*, the biophysical basis of how the motility defects genetically characterized by Mohari et al. (6) generate effective tumbles remains unknown. Therefore, in this section, we make connection between previous computational results on flagellar bundling and unbundling and the generation of tumbles by the class I to III *cms* mutants in *A. tumefaciens*, central to their migration in agar assays.

Reigh et al. (14) computationally investigated the stability of a flagellar bundle (consisting of three polar flagella) using a hybrid approach that combines molecular dynamics simulations of bacterial flagellar filaments, using *Rhizobium lupini* structural parameters and a mesoscale hydrodynamics simulation method for the fluid. We note that *Rhizobium lupini* has been renamed as *Agrobacterium* sp. H13-3, and is highly related to *Agrobacterium tumefaciens* (62). They determined hydrodynamic interactions between flagella, short-range volume exclusion and flagellar flexibility to be key physical factors governing their synchronization and bundling. For small differences in adjacent motor torques, they find bundle formation to be robust. As the torque difference increases, a phase lag in flagellar rotations occurs, followed by intermittent slippage and finally unbundling. In earlier work, they showed that synchronization starts at the fixed ends of the flagella and propagates to the tips (17). At higher torques the bundles were found to be tighter, leading to marginally higher swimming efficiency (14). In the slippage and unbundled states, the force and torque balances on the cell body determine its new orientation (17).

Relating these simulation results and the class I and II pseudotaxis mutants identified in Mohari et al. (6), the flexibility and length of the flagellar hook are likely to be important physical parameters affecting the hydrodynamic interactions between flagella. For bacteria such as *A. tumefaciens* possessing complex flagellar filaments that

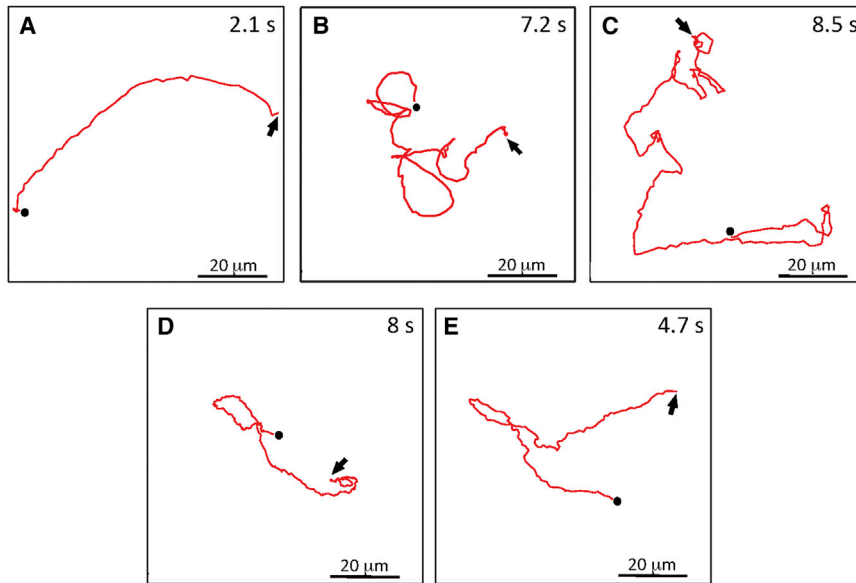

FIGURE 3 Single-cell tracking of *A. tumefaciens* strains. Two-dimensional swimming trajectories in fluid for the different strains are shown. (A)  $\Delta che$ , (B) wild-type, (C) class I (*flgE*), (D) class II (*fliK*), and (E) class III (*motA*). The starts and ends of tracks are denoted by arrows and dots, respectively. The duration of each track is shown. See also Mohari et al. (6) for other representative trajectories. To see this figure in color, go online.

are more rigid than homogeneous filaments such as for enteric bacteria, the physical properties of the hook may be especially important in driving flagellar bundling and unbundling. We speculate that for these mutant classes, the degree to which the flagella are able to synchronize and form a bundle is affected, as are the resulting forces and torques on the cell body that determine its reorientation angle when a bundle is disrupted.

For the class III mutant involving MotA, it has been shown that electrostatic interactions between this stator protein and the rotor protein FliG are important for bacterial flagellar motor torque generation (7,63–66). Given that rotational slowing is the proposed mechanism for tumbling in members of the family *Rhizobiaceae* with unidirectional (CW-only) motors, it is possible that in class III mutants, the speed of rotation of flagellar motors is altered in such a way that bundling is disrupted, leading to a nonzero tumbling frequency and hence the pseudotaxis phenotype. We note that in a class III mutant, the cell speed is also diminished with respect to wild-type, consistent with the role of MotA in powering the flagellar motor (6).

These computational results suggest how the observed, spontaneous motility defects influencing flagellar bundling and unbundling may give rise to effective tumbles in *A. tumefaciens cms* mutants, and hence the pseudotaxis phenotype. They also point to how details of the flagellar unbundling process determining the degree of directional reorientation at a tumble may differ among the mutant classes, giving rise to differential diffusive spreading. Further experimental studies are needed to quantify the effects of the identified motility defects in the tumbling process through measurements of individual flagellar rotation and unbundling dynamics of multiple flagella. These studies on *cms* mutants will also serve to better characterize the biophys-

ical mechanisms underlying the motility paradigm in *A. tumefaciens* and related species.

### Analysis of swim ring assays

To make connection with motility agar assays, in addition to diffusion, we must account for bacterial growth. In the absence of chemotaxis, we take the bacterial density,  $\rho(r,t)$ , to satisfy the following:

$$\frac{\partial \rho}{\partial t} = D \nabla^2 \rho + \lambda \rho, \quad (13)$$

where  $\lambda$  is the growth rate. Recent work has investigated patterns of growth and gene expression of chemotactic bacterial populations in space and time, using as a model system expanding populations of *E. coli* on soft agar plates with galactose as a nutrient source (67). Here, we neglect the spatial dependence of the growth rate in the expanding disc of *cms* mutants, assuming  $\lambda$  to be uniform and constant (i.e., not limited by nutrient). Similar future assays can be used to establish the spatiotemporal dependence of growth in *cms* mutants, where comparison with the chemotactic strains will help elucidate how bacteria evolve to balance growth, chemotaxis, diffusion, and survival.

By considering the simplified model of growth coupled to diffusion given by Eq. 13, we are able to write an analytical solution for  $\rho(r,t)$ . For  $N_0$  bacteria inoculated at the origin at time  $t = 0$ , we obtain the following:

$$\rho(r,t) = \frac{N_0}{4\pi Dt} \exp\left(-\frac{r^2}{4Dt}\right) \exp(\lambda t). \quad (14)$$

Assuming the designation of the swim ring boundary,  $\mathcal{R}(t)$ , is made on the basis of an absolute threshold of cell

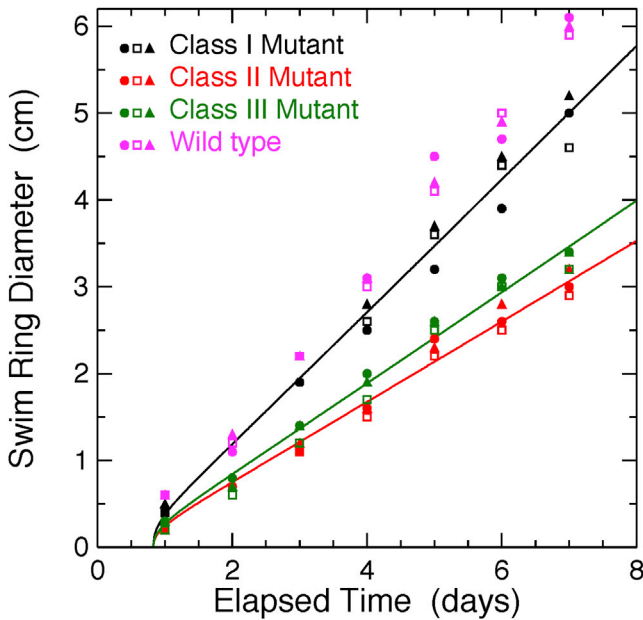

FIGURE 4 Fits to swim ring expansion as a function of time for the three classes of mutants, according to Eq. 15. We find  $D_I = (7.9 \pm 0.2)\mu\text{m}^2/\text{s}$ ,  $D_{II} = (2.9 \pm 0.1)\mu\text{m}^2/\text{s}$ ,  $D_{III} = (3.7 \pm 0.1)\mu\text{m}^2/\text{s}$ , and  $\rho_0 = (1.1 \pm 1.0) \times 10^{-3}\mu\text{m}^{-2}$ , where  $\rho_0$  is constrained to be the same for all three fits. For comparison, the swim ring expansion for wild-type is also included, showing that the *cms* mutants perform comparably with the chemotacting wild-type in agar (to within factors of  $\sim 0.5$  to  $0.8$  at 1 week). Three trials are plotted for each mutant class.

density,  $\rho_{th}$  (as visually determined by the experimenter), and solving  $\rho(\mathcal{R}, t) = \rho_{th}$ , we find the following:

$$\mathcal{R}^2(t) = 4D\lambda t^2 - 4Dt \ln(4\pi\rho_0 D t), \quad (15)$$

where  $\rho_0 = \rho_{th}/N_0$ . Note that the leading behavior for  $\mathcal{R}(t)$  is linear in  $t$ , in agreement with the observed linear expansion of the swim ring radius in time. As commented by Wolfe and Berg (5), this dependence deviates from the expected diffusive spread with  $t^{1/2}$  time dependence as a result of cell division.

For *A. tumefaciens*, the growth rate in minimal media is given by  $\lambda \approx \ln 2/3 \text{ h} = 6.4 \times 10^{-5} \text{ s}^{-1}$ . Using this value, in Fig. 4, we show the swim ring data (for  $C = 0.25\%$  motility agar) and fits according to Eq. 15. The fitted values of diffusion constants for class I to III mutants are  $D_I = (7.9 \pm 0.2)\mu\text{m}^2/\text{s}$ ,  $D_{II} = (2.9 \pm 0.1)\mu\text{m}^2/\text{s}$ , and  $D_{III} = (3.7 \pm 0.1)\mu\text{m}^2/\text{s}$ . We note that the fit results for the diffusion constants,  $D_{I-III}$ , are insensitive to the fit value for  $\rho_0$ .

To compare fit values with our theoretical result for diffusion in the small pore limit (Eq. 11), we use the mean values of the tumbling frequencies determined by Mohari et al. (6) in the free-swimming tracking assays. The mean pore size,  $\langle a \rangle$ , is estimated from previous work on atomic force microscopy analysis of agarose gels (68,69) at higher concentrations. Agarose gel is characterized as a complex, heterogeneous fibrous matrix with a wide pore size distribution that broadens with decreasing gel concentration. We estimate the mean pore size to be in the range  $740 \text{ nm} < \langle a \rangle < 4800 \text{ nm}$  for  $C = 0.25\%$  (see the Supporting Material). We note that this range is consistent with observations by Wolfe and Berg (5) of the mean run lengths in  $0.20$  to  $0.35\%$  agar, ranging from less than one to several micrometers in length. In Table 1, we give the predicted ranges for values of  $D_{I-III}$  for turn angle distributions previously measured in bulk, giving  $\alpha = 0$  (for *P. putida*) and  $\alpha = 1/3$  (for *E. coli*), as previously discussed. The relative error on the theoretical value of the diffusion constant ( $\sigma_D/D$ ) given the statistical uncertainty on the measured tumbling frequencies from Mohari et al. (6) is also shown.

We note that the values of  $D$  obtained from fits to the agar assays are generally consistent with the theoretical ranges. For class I, the fit result is slightly greater than the predicted values. The agreement is improved for larger values of tumbling frequency and pore size, both of which possess broad distributions. Also, because  $D$  is a monotonically increasing function of  $\alpha$ , greater directional persistence in the tumble angle distribution of class I mutants in agar would lead to a larger theoretical value for the diffusion constant, further improving this agreement. We also note that although class II mutants have a higher mean tumbling frequency,  $D_{II}$  is smaller than  $D_I$  and  $D_{III}$ , suggesting that in agar, class II mutants have less directional persistence than the other two mutant classes. Indeed, as discussed above, details of the flagellar unbundling process determining the tumble angle distribution could be different for each mutant class.

An open question that emerges is how the values of the governing biophysical parameters in a porous environment differ from those in bulk fluid used in our fits. In the Supporting Material, we discuss how steric inhibition may modify the tumbling frequency and directional persistence. Furthermore, the tumble angle distribution itself may differ for cells swimming in bulk fluid relative to that in a porous environment where the scale of confinement is comparable to the cell size and smaller than the flagellar length. For intermediate and large pore sizes, where  $D$  also depends on the cell speed, measurement of  $v$  in the porous medium is

TABLE 1 Diffusion Constants for Class I to III *A. tumefaciens* Mutant Strains

| Class | $\omega$ ( $\text{s}^{-1}$ ) | Predicted Range ( $\alpha = 0$ ) ( $\mu\text{m}^2 / \text{s}^{-1}$ ) | Predicted Range ( $\alpha = 1/3$ ) ( $\mu\text{m}^2 / \text{s}^{-1}$ ) | $\sigma_D/D$ | Fit Result ( $\mu\text{m}^2 / \text{s}^{-1}$ ) |
|-------|------------------------------|----------------------------------------------------------------------|------------------------------------------------------------------------|--------------|------------------------------------------------|
| I     | $(0.8 \pm 0.1)$              | $(0.07 < D_I < 3.1)$                                                 | $(0.15 < D_I < 6.2)$                                                   | 0.12         | $7.9 \pm 0.2$                                  |
| II    | $(1.0 \pm 0.1)$              | $(0.09 < D_{II} < 3.9)$                                              | $(0.18 < D_{II} < 7.6)$                                                | 0.10         | $2.9 \pm 0.1$                                  |
| III   | $(0.6 \pm 0.1)$              | $(0.05 < D_{III} < 2.3)$                                             | $(0.11 < D_{III} < 4.6)$                                               | 0.17         | $3.7 \pm 0.1$                                  |



required as input into the theoretical result for the diffusion constant. Therefore, to fully corroborate the agreement between experiment and theory, the comparison in [Table 1](#) must be carried out using parameters obtained for a given porous medium, informed by experimental approaches such as those quantifying the motility of bacterial cells in microfabricated channel arrays ([70](#)) and in polymer solutions ([71](#)) using high-throughput microscopy methods ([72,73](#)), as well as theoretical and computational studies of flagellated motility in confined geometries ([74–76](#)). For motion of bacteria in porous media filled with biological or environmental fluids containing proteins and other polymers, viscoelastic effects on motility parameters must also be considered ([71,77–82](#)).

## DISCUSSION

Our theoretical analysis of the random walk of bacterial cells in a homogeneous porous medium quantifies the dependence of the diffusion constant on the governing physical and biophysical parameters. The average pore size, tumbling frequency, cell speed, and directional persistence arising from the tumble angle distribution. As such, it unifies the phenomenology of pseudotaxis achieved via different classes of mutations in the motility apparatus of various bacterial species identified experimentally in earlier studies ([5,6,35,36,41](#)). Importantly, our model is based on the cell's intrinsic tumbling mechanism as the biophysical process giving rise to directional reorientation, in contrast with previous treatments based on kinetic gas theory in porous media, whereby the random walk trajectories of diffusing particles are governed by collisions of hard ballistic particles with each other and boundaries. Indeed, as directly observed by Wolfe and Berg ([5](#)), a cell encountering internal agar walls is not deflected, but rather idles until a subsequent tumble reorients it. Incorporating idling at pore walls constitutes a fundamentally new microscopic mechanism of bacterial diffusion in porous media, to our knowledge, and the resulting theoretical model offers an understanding of existing experimental observations, not captured by previous models, as well as suggestions for future experiments.

Although we show that values of the diffusion constant obtained from fits to the swim ring expansion in agar assays of *A. tumefaciens cms* mutants are generally consistent with our theoretical result in the small pore limit, we note that the diffusion constant is a coarse discriminant of the agreement between experiment and theory. Further experimental studies of single-cell motility in porous media are required to quantify the cell's motion in environments where the spatial scale of confinement is comparable to the size of the cell and the flagellar bundle. Explicit measurement of biophysical parameters (tumbling frequency, directional persistence, cell speed) that reflect the presence of steric constraints in a given porous medium as input into the theoretical result for the diffusion constant will allow for more direct corroboration.

Our findings suggest that details of the tumbling process can be adapted for effective migration through a given microenvironment with characteristic pore size. Indeed, we find that with other motility and environmental parameters held fixed, the diffusion constant is maximal at a given tumbling frequency. Supporting this, recent work has highlighted the difference in the chemotactic response of bacterial cells in liquid media versus agar from the standpoint of optimal concentrations of chemotaxis proteins ([CheR, CheB]) that determine the adaptation rate and tumbling frequency ([83](#)).

Our results have direct relevance to biomimetic engineering of microrobots emulating bacteria, for controlled navigation and cargo delivery in applications such as medical diagnosis, drug delivery, and bioremediation ([84–87](#)). In many cases, these engineered active swimmers utilize flagellar-based motility for swimming in the fluid-filled porous environments that constitute human tissues, biofilm exopolymeric matrix and soil. Our work suggests that details of the run-and-tumble dynamics, through the tumbling frequency and tumble angle distribution, can be tuned to the microarchitecture of the environment to optimize the spread of biologically inspired synthetic swimmers in various habitats.

## SUPPORTING MATERIAL

Supporting Materials and Methods and two figures are available at [http://www.biophysj.org/biophysj/supplemental/S0006-3495\(15\)01117-0](http://www.biophysj.org/biophysj/supplemental/S0006-3495(15)01117-0).

## AUTHOR CONTRIBUTIONS

N.L., B.M., C.F., and S.S. designed the research, performed the research, and wrote the article.

## ACKNOWLEDGMENTS

This work was supported by National Science Foundation Award PHY-0645652 (S.S.), National Institutes of Health R01 GM080546 (C.F.), and in part by the National Science Foundation under Grant No. PHYS-1066293 and the hospitality of the Aspen Center for Physics (S.S.).

## SUPPORTING CITATIONS

References ([88–97](#)) appear in the [Supporting Material](#).

## REFERENCES

1. Moens, S., and J. Vanderleyden. 1996. Functions of bacterial flagella. *Crit. Rev. Microbiol.* 22:67–100.
2. Faguy, D. M., and K. F. Jarrell. 1999. A twisted tale: the origin and evolution of motility and chemotaxis in prokaryotes. *Microbiology.* 145:279–281.
3. Wei, Y., X. Wang, ..., B. R. Levin. 2011. The population dynamics of bacteria in physically structured habitats and the adaptive virtue of random motility. *Proc. Natl. Acad. Sci. USA.* 108:4047–4052.

4. Martel, S. 2012. Bacterial microsystems and microrobots. *Biomed. Microdevices*. 14:1033–1045.
5. Wolfe, A. J., and H. C. Berg. 1989. Migration of bacteria in semisolid agar. *Proc. Natl. Acad. Sci. USA*. 86:6973–6977.
6. Mohari, B., N. A. Licata, ..., C. Fuqua. 2015. Novel pseudotaxis mechanisms improve migration of straight-swimming bacterial mutants through a porous environment. *MBio*. 6:e00005.
7. Berg, H. C. 2003. The rotary motor of bacterial flagella. *Annu. Rev. Biochem.* 72:19–54.
8. Kubori, T., N. Shimamoto, ..., S. Aizawa. 1992. Morphological pathway of flagellar assembly in *Salmonella typhimurium*. *J. Mol. Biol.* 226:433–446.
9. Scharf, B. 2002. Real-time imaging of fluorescent flagellar filaments of *Rhizobium lupini* H13-3: flagellar rotation and pH-induced polymorphic transitions. *J. Bacteriol.* 184:5979–5986.
10. Götz, R., and R. Schmitt. 1987. *Rhizobium meliloti* swims by unidirectional, intermittent rotation of right-handed flagellar helices. *J. Bacteriol.* 169:3146–3150.
11. Attmannspacher, U., B. Scharf, and R. Schmitt. 2005. Control of speed modulation (chemokinesis) in the unidirectional rotary motor of *Sinorhizobium meliloti*. *Mol. Microbiol.* 56:708–718.
12. Kim, M., J. C. Bird, ..., T. R. Powers. 2003. A macroscopic scale model of bacterial flagellar bundling. *Proc. Natl. Acad. Sci. USA*. 100:15481–15485.
13. Vladimirov, N., D. Lebedez, and V. Sourjik. 2010. Predicted auxiliary navigation mechanism of peritrichously flagellated chemotactic bacteria. *PLOS Comput. Biol.* 6:e1000717.
14. Reigh, S. Y., R. G. Winkler, and G. Gompper. 2012. Synchronization and bundling of anchored bacterial flagella. *Soft Matter*. 8:4363–4372.
15. Lim, S., and C. S. Peskin. 2012. Fluid-mechanical interaction of flexible bacterial flagella by the immersed boundary method. *Phys. Rev. E Stat. Nonlin. Soft Matter Phys.* 85:036307.
16. Brown, M. T., B. C. Steel, ..., R. M. Berry. 2012. Flagellar hook flexibility is essential for bundle formation in swimming *Escherichia coli* cells. *J. Bacteriol.* 194:3495–3501.
17. Reigh, S. Y., R. G. Winkler, and G. Gompper. 2013. Synchronization, slippage, and unbundling of driven helical flagella. *PLoS One*. 8:e70868.
18. Flores, H., E. Lobaton, ..., R. Cortez. 2005. A study of bacterial flagellar bundling. *Bull. Math. Biol.* 67:137–168.
19. Berg, H. C. 2004. *E. coli* in Motion. Springer, New York.
20. Delalez, N. J., G. H. Wadhams, ..., J. P. Armitage. 2010. Signal-dependent turnover of the bacterial flagellar switch protein FliM. *Proc. Natl. Acad. Sci. USA*. 107:11347–11351.
21. Lele, P. P., R. W. Branch, ..., H. C. Berg. 2012. Mechanism for adaptive remodeling of the bacterial flagellar switch. *Proc. Natl. Acad. Sci. USA*. 109:20018–20022.
22. Yuan, J., R. W. Branch, ..., H. C. Berg. 2012. Adaptation at the output of the chemotaxis signalling pathway. *Nature*. 484:233–236.
23. Lele, P. P., B. G. Hosu, and H. C. Berg. 2013. Dynamics of mechanosensing in the bacterial flagellar motor. *Proc. Natl. Acad. Sci. USA*. 110:11839–11844.
24. Tipping, M. J., N. J. Delalez, ..., J. P. Armitage. 2013. Load-dependent assembly of the bacterial flagellar motor. *MBio*. 4, e00551-13.
25. Berg, H. C. 1993. *Random Walks in Biology*. Princeton University Press, Princeton, NJ.
26. Adler, J. 1969. Chemoreceptors in bacteria. *Science*. 166:1588–1597.
27. Armstrong, J. B., and J. Adler. 1969. Location of genes for motility and chemotaxis on the *Escherichia coli* genetic map. *J. Bacteriol.* 97:156–161.
28. Adler, J. 1973. A method for measuring chemotaxis and use of the method to determine optimum conditions for chemotaxis by *Escherichia coli*. *J. Gen. Microbiol.* 74:77–91.
29. Adler, J. 1976. Chemotaxis in bacteria. *J. Supramol. Struct.* 4:305–317.
30. Parkinson, J. S., S. R. Parker, ..., S. E. Houts. 1983. Interactions between chemotaxis genes and flagellar genes in *Escherichia coli*. *J. Bacteriol.* 155:265–274.
31. Parkinson, J. S. 1978. Complementation analysis and deletion mapping of *Escherichia coli* mutants defective in chemotaxis. *J. Bacteriol.* 135:45–53.
32. Parkinson, J. S., and S. E. Houts. 1982. Isolation and behavior of *Escherichia coli* deletion mutants lacking chemotaxis functions. *J. Bacteriol.* 151:106–113.
33. Yonekawa, H., H. Hayashi, and J. S. Parkinson. 1983. Requirement of the cheB function for sensory adaptation in *Escherichia coli*. *J. Bacteriol.* 156:1228–1235.
34. Alon, U., L. Camarena, ..., J. B. Stock. 1998. Response regulator output in bacterial chemotaxis. *EMBO J.* 17:4213–4542.
35. Magariyama, Y., S. Yamaguchi, and S. Aizawa. 1990. Genetic and behavioral analysis of flagellar switch mutants of *Salmonella typhimurium*. *J. Bacteriol.* 172:4359–4369.
36. Sockett, H., S. Yamaguchi, ..., R. M. Macnab. 1992. Molecular analysis of the flagellar switch protein FliM of *Salmonella typhimurium*. *J. Bacteriol.* 174:793–806.
37. Ames, P., Y. A. Yu, and J. S. Parkinson. 1996. Methylation segments are not required for chemotactic signalling by cytoplasmic fragments of Tsr, the methyl-accepting serine chemoreceptor of *Escherichia coli*. *Mol. Microbiol.* 19:737–746.
38. Lapidus, I. R. 1980. ‘Pseudochemotaxis’ by micro-organisms in an attractant gradient. *J. Theor. Biol.* 86:91–103.
39. Stock, J., A. Borczuk, ..., J. E. B. Burchenal. 1985. Compensatory mutations in receptor function: a reevaluation of the role of methylation in bacterial chemotaxis. *Proc. Natl. Acad. Sci. USA*. 82:8364–8368.
40. Berg, H. C., and L. Turner. 1990. Chemotaxis of bacteria in glass capillary assays. *Escherichia coli*, motility, microchannel plate, and light scattering. *Biophys. J.* 58:919–930.
41. Merritt, P. M., T. Danhorn, and C. Fuqua. 2007. Motility and chemotaxis in *Agrobacterium tumefaciens* surface attachment and biofilm formation. *J. Bacteriol.* 189:8005–8014.
42. Chesnokova, O., J. B. Coutinho, ..., C. I. Kado. 1997. Characterization of flagella genes of *Agrobacterium tumefaciens*, and the effect of a bald strain on virulence. *Mol. Microbiol.* 23:579–590.
43. Loake, G. J., A. M. Ashby, and C. H. Shaw. 1988. Attraction of *Agrobacterium tumefaciens* C58C<sup>1</sup> towards sugars involves a highly sensitive chemotaxis system. *J. Gen. Microbiol.* 134:1427–1432.
44. Armitage, J. P., and R. Schmitt. 1997. Bacterial chemotaxis: *Rhodobacter sphaeroides* and *Sinorhizobium meliloti*—variations on a theme? *Microbiology*. 143:3671–3682.
45. Götz, R., N. Limmer, ..., R. Schmitt. 1982. Motility and chemotaxis in two strains of *Rhizobium* with complex flagella. *J. Gen. Microbiol.* 128:789–798.
46. Eggenhofer, E., R. Rachel, ..., B. Scharf. 2006. MotD of *Sinorhizobium meliloti* and related alpha-proteobacteria is the flagellar-hook-length regulator and therefore reassigned as FliK. *J. Bacteriol.* 188:2144–2153.
47. Tempé, J., A. Petit, ..., J. Schell. 1977. Thermosensitive step associated with transfer of the Ti plasmid during conjugation: possible relation to transformation in crown gall. *Proc. Natl. Acad. Sci. USA*. 74:2848–2849.
48. Lovely, P. S., and F. W. Dahlquist. 1975. Statistical measures of bacterial motility and chemotaxis. *J. Theor. Biol.* 50:477–496.
49. Flory, P. J. 1969. *Statistical Mechanics of Chain Molecules*. John Wiley and Sons, New York.
50. Duffy, K. J., P. T. Cummings, and R. M. Ford. 1995. Random walk calculations for bacterial migration in porous media. *Biophys. J.* 68:800–806.
51. Barton, J. W., and R. M. Ford. 1997. Mathematical model for characterization of bacterial migration through sand cores. *Biotechnol. Bioeng.* 53:487–496.

52. Ford, R. M., and R. W. Harvey. 2007. Role of chemotaxis in the transport of bacteria through saturated porous media. *Adv. Water Resour.* 30:1608–1617.
53. Duffy, K. J., and R. M. Ford. 1997. Turn angle and run time distributions characterize swimming behavior for *Pseudomonas putida*. *J. Bacteriol.* 179:1428–1430.
54. Chen, K. C., R. M. Ford, and P. T. Cummings. 1998. Mathematical models for motile bacterial transport in cylindrical tubes. *J. Theor. Biol.* 195:481–504.
55. Croze, O. A., G. P. Ferguson, ..., W. C. K. Poon. 2011. Migration of chemotactic bacteria in soft agar: role of gel concentration. *Biophys. J.* 101:525–534.
56. Schnitzer, M. J., S. M. Block, ..., E. M. Purcell. 1990. Strategies for chemotaxis. *Symp. Soc. Gen. Microbiol.* 46:15–34.
57. Schnitzer, M. J. 1993. Theory of continuum random walks and application to chemotaxis. *Phys. Rev. E Stat. Nonlin. Soft Matter Phys.* 48:2553–2568.
58. Pollard, W. G., and R. D. Present. 1948. On gaseous self-diffusion in long capillary tubes. *Phys. Rev.* 73:762.
59. Knudsen, M. 1909. The law of the molecular flow and viscosity of gases moving through tubes. *Ann. Phys.* 28:75–130.
60. Berg, H. C., and D. A. Brown. 1972. Chemotaxis in *Escherichia coli* analysed by three-dimensional tracking. *Nature.* 239:500–504.
61. Chen, K. C., R. M. Ford, and P. T. Cummings. 1998. The global turning probability density function for motile bacteria and its applications. *J. Theor. Biol.* 195:139–155.
62. Wibberg, D., J. Blom, ..., A. Schlüter. 2011. Complete genome sequencing of *Agrobacterium* sp. H13-3, the former *Rhizobium lupini* H13-3, reveals a tripartite genome consisting of a circular and a linear chromosome and an accessory plasmid but lacking a tumor-inducing Ti-plasmid. *J. Biotechnol.* 155:50–62.
63. Morimoto, Y. V., S. Nakamura, ..., T. Minamino. 2013. Distinct roles of highly conserved charged residues at the MotA-FliG interface in bacterial flagellar motor rotation. *J. Bacteriol.* 195:474–481.
64. Zhou, J., and D. F. Blair. 1997. Residues of the cytoplasmic domain of MotA essential for torque generation in the bacterial flagellar motor. *J. Mol. Biol.* 273:428–439.
65. Zhou, J., S. A. Lloyd, and D. F. Blair. 1998. Electrostatic interactions between rotor and stator in the bacterial flagellar motor. *Proc. Natl. Acad. Sci. USA.* 95:6436–6441.
66. Braun, T. F., S. Poulson, ..., D. F. Blair. 1999. Function of proline residues of MotA in torque generation by the flagellar motor of *Escherichia coli*. *J. Bacteriol.* 181:3542–3551.
67. Koster, D. A., A. Mayo, ..., U. Alon. 2012. Surface growth of a motile bacterial population resembles growth in a chemostat. *J. Mol. Biol.* 424:180–191.
68. Pernodet, N., M. Maaloum, and B. Tinland. 1997. Pore size of agarose gels by atomic force microscopy. *Electrophoresis.* 18:55–58.
69. Maaloum, M., N. Pernodet, and B. Tinland. 1998. Agarose gel structure using atomic force microscopy: gel concentration and ionic strength effects. *Electrophoresis.* 19:1606–1610.
70. Männik, J., R. Driessen, ..., C. Dekker. 2009. Bacterial growth and motility in sub-micron constrictions. *Proc. Natl. Acad. Sci. USA.* 106:14861–14866.
71. Martinez, V. A., J. Schwarz-Linek, ..., W. C. Poon. 2014. Flagellated bacterial motility in polymer solutions. *Proc. Natl. Acad. Sci. USA.* 111:17771–17776.
72. Wilson, L. G., V. A. Martinez, ..., W. C. K. Poon. 2011. Differential dynamic microscopy of bacterial motility. *Phys. Rev. Lett.* 106:018101.
73. Martinez, V. A., R. Besseling, ..., W. C. K. Poon. 2012. Differential dynamic microscopy: a high-throughput method for characterizing the motility of microorganisms. *Biophys. J.* 103:1637–1647.
74. Liu, B., K. S. Breuer, and T. R. Powers. 2014. Propulsion by a helical flagellum in a capillary tube. *Phys. Fluids.* 26:011701.
75. Acemoglu, A., and S. Yesilyurt. 2014. Effects of geometric parameters on swimming of micro organisms with single helical flagellum in circular channels. *Biophys. J.* 106:1537–1547.
76. Ledesma-Aguilar, R., and J. M. Yeomans. 2013. Enhanced motility of a microswimmer in rigid and elastic confinement. *Phys. Rev. Lett.* 111:138101.
77. Berg, H. C., and L. Turner. 1979. Movement of microorganisms in viscous environments. *Nature.* 278:349–351.
78. Magariyama, Y., and S. Kudo. 2002. A mathematical explanation of an increase in bacterial swimming speed with viscosity in linear-polymer solutions. *Biophys. J.* 83:733–739.
79. Fu, H. C., T. R. Powers, and C. W. Wolgemuth. 2007. Theory of swimming filaments in viscoelastic media. *Phys. Rev. Lett.* 99:25801.
80. Lauga, E., and T. R. Powers. 2009. The hydrodynamics of swimming microorganisms. *Rep. Prog. Phys.* 72:096601.
81. Liu, B., T. R. Powers, and K. S. Breuer. 2011. Force-free swimming of a model helical flagellum in viscoelastic fluids. *Proc. Natl. Acad. Sci. USA.* 108:19516–19520.
82. Riley, E. E., and E. Lauga. 2014. Enhanced active swimming in viscoelastic fluids. *Europhys. Lett.* 108:34003.
83. Vladimirov, N., L. Løvdok, ..., V. Sourjik. 2008. Dependence of bacterial chemotaxis on gradient shape and adaptation rate. *PLOS Comput. Biol.* 4:e1000242.
84. Kei Cheang, U., D. Roy, ..., M. J. Kim. 2010. Fabrication and magnetic control of bacteria-inspired robotic microswimmers. *Appl. Phys. Lett.* 97:213704.
85. Kim, M. J., A. A. Julius, and E. Steager. 2012. *Microbiorobotics: Biologically Inspired Microscale Robotic Systems.* Elsevier, Waltham, MA.
86. Tottori, S., L. Zhang, ..., B. J. Nelson. 2013. Assembly, disassembly, and anomalous propulsion of microscopic helices. *Nano Lett.* 13:4263–4268.
87. Peyer, K. E., L. Zhang, and B. J. Nelson. 2013. Bio-inspired magnetic swimming microrobots for biomedical applications. *Nanoscale.* 5:1259–1272.
88. Nimmo, J. R. 2004. Porosity and pore size distribution. In *Encyclopedia of Soils in the Environment, Vol. 3.* D. Hillel, editor. Elsevier, London, pp. 295–303.
89. Locsei, J. T. 2007. Persistence of direction increases the drift velocity of run and tumble chemotaxis. *J. Math. Biol.* 55:41–60.
90. Bubendorfer, S., M. Koltai, ..., K. M. Thormann. 2014. Secondary bacterial flagellar system improves bacterial spreading by increasing the directional persistence of swimming. *Proc. Natl. Acad. Sci. USA.* 111:11485–11490.
91. Griess, G. A., K. B. Guiseley, ..., P. Serwer. 1998. The formation of small-pore gels by an electrically charged agarose derivative. *J. Struct. Biol.* 123:134–142.
92. Stellwagen, N. C. 1998. Apparent pore size of polyacrylamide gels: comparison of gels cast and run in Tris-acetate-EDTA and Tris-borate-EDTA buffers. *Electrophoresis.* 19:1542–1547.
93. Narayanan, J., J. Y. Xiong, and X. Y. Liu. 2006. Determination of agarose gel pore size: absorbance measurements vis a vis other techniques. *J. Phys. Conf. Ser.* 28:83–86.
94. Valentine, M. T., P. D. Kaplan, ..., D. A. Weitz. 2001. Investigating the microenvironments of inhomogeneous soft materials with multiple particle tracking. *Phys. Rev. E Stat. Nonlin. Soft Matter Phys.* 64:061506.
95. Ogston, A. G. 1958. The spaces in a uniform random suspension of fibres. *Trans. Faraday Soc.* 54:1754–1757.
96. DeGennes, P. G. 1979. *Scaling Concepts in Condensed Matter Physics.* Cornell University Press, Ithaca, NY.
97. Fakhri, N., F. C. MacKintosh, ..., M. Pasquali. 2010. Brownian motion of stiff filaments in a crowded environment. *Science.* 330:1804–1807.

## Supplemental Material for: Diffusion of Bacterial Cells in Porous Media

Nicholas A. Licata,<sup>◇\*</sup>, Bitan Mohari,<sup>†</sup>, Clay Fuqua,<sup>†</sup> and Sima Setayeshgar<sup>◇</sup><sup>◇</sup>Department of Physics and <sup>†</sup>Department of Biology,  
Indiana University, Bloomington, Indiana 47405,<sup>\*</sup>Department of Natural Sciences, University of Michigan-Dearborn, Dearborn, MI 48128**Supplementary Section A:  $D = D(\omega, a, v, \alpha)$** 

In Fig. S1, we plot  $D(\omega, v, a, \alpha)$  (in units of  $\mu\text{m}^2\text{s}^{-1}$ ) as a function of  $\omega$  and  $v$  for fixed  $a = 50 \mu\text{m}$  and  $\alpha = 1/3$ . For soil bacteria in their natural habitat, the pore size distribution depends on soil porosity, which is in turn determined by factors such as the packing density, particle shape and size distribution. For example, for silty sand, the pore size distribution is peaked at approximately 50 and 30  $\mu\text{m}$  at low and high density, respectively, with a broad tail at high density (1). For concreteness, we use a value of  $a = 50 \mu\text{m}$  in this plot, representative of a silty soil environment.

Additionally, we note that  $D$  is a monotonically increasing function of  $\alpha \in (-1, 1)$ . This is consistent with previous results on the chemotactic drift velocity (2), as well as recent work showing that a secondary flagellar system in *Shewanella putrefaciens* CN-32 improves spreading in soft agar by increasing directional persistence ( $\alpha \rightarrow 1$ ) (3). Also of direct relevance, Berg and Turner (4) note the importance of guidance in measurements of diffusion constants of bacterial cells in capillary tubes: the larger values of diffusion constants in 10  $\mu\text{m}$  diameter versus 50  $\mu\text{m}$  diameter tubes is attributed to cells primarily moving in one direction (up or down) the tube, with cross-wise motion suppressed, corresponding to larger directional persistence.

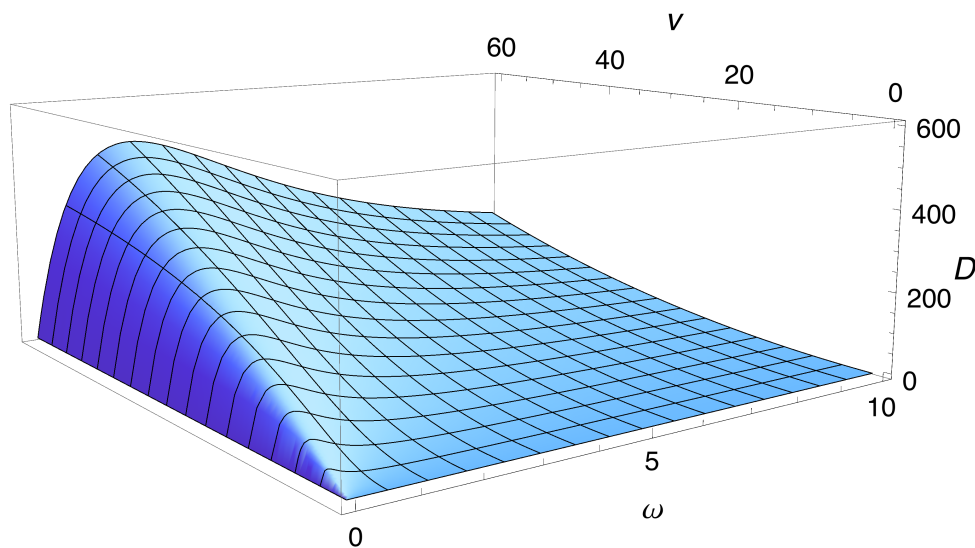

Figure S1: The diffusion coefficient  $D$  (in units of  $\mu\text{m}^2\text{s}^{-1}$ ), as given by Eq. 7 in the main text, as a function of  $\omega$  (in units of  $\text{s}^{-1}$ ) and  $v$  (in units of  $\mu\text{m}\text{s}^{-1}$ ) for fixed  $a = 50 \mu\text{m}$  and  $\alpha = 1/3$ . For free diffusion in bulk fluid, bacterial diffusion constants across a number of species are in the range 200 – 1900  $\mu\text{m}^2\text{s}^{-1}$  (5, 6).

## Supplementary Section B: Steric Inhibition

When a bacterium collides with an internal boundary, steric inhibition will result in some tumbles that do not lead to new runs unless a sufficiently large turn angle is achieved. Hence, the runtime distribution in the presence of obstacles is modified with respect to that in bulk solution. Letting  $\varepsilon$  denote the probability that a tumble results in escape from an obstacle (or in analogy with the random walk model of the polymer chain, the probability of laying down a new link), it can be written as

$$\varepsilon = \int_{\beta}^{\pi} W(\theta) \sin \theta d\theta, \quad (1)$$

where we have assumed that the bacterium must tumble by an angle  $\beta$  to clear the obstacle. This serves to renormalize the tumbling frequency when a boundary collision occurs according to  $\tilde{\omega} = \varepsilon\omega$ . Consequently, the runtime distribution becomes

$$R(\tau) = \omega \exp(-\omega\tau) \quad \tau < a/v, \quad (2)$$

and

$$\tilde{R}(\tau) = \exp\left(-\frac{\omega a}{v}\right) \tilde{\omega} \exp\left(-\tilde{\omega}\left(\tau - \frac{a}{v}\right)\right) \quad \tau > a/v. \quad (3)$$

The resulting mean run time,  $\langle\tau\rangle = \tilde{T}$ , is given by

$$\langle\tau\rangle = \frac{1}{\omega} \left(1 - \exp\left(-\frac{\omega a}{v}\right)\right) + \frac{1}{\tilde{\omega}} \exp\left(-\frac{\omega a}{v}\right). \quad (4)$$

Note that for  $\varepsilon = 1$ , we retrieve the expected result,  $\langle\tau\rangle = 1/\omega$ . In the limit of bulk medium, where  $\omega a/v \rightarrow \infty$ , we also find  $\langle\tau\rangle \rightarrow 1/\omega$ . The mean runtime exceeds the value  $1/\omega$  for all  $(x, \varepsilon)$ , and diverges as  $\varepsilon \rightarrow 0$ , as expected.

Additionally, the mean projection of bonds is modified, most simply according to

$$\tilde{\alpha} = (1 - e^{-x}) \alpha + e^{-x} \alpha_{\beta}, \quad (5)$$

where

$$\alpha_{\beta} = \int_{\beta}^{\pi} W(\theta) \sin \theta \cos \theta d\theta. \quad (6)$$

Using the modified runtime distribution, we find  $\langle\ell\rangle$  and  $\langle\ell^2\rangle$  to be unchanged; hence, the diffusion constant becomes

$$\tilde{D} = \frac{va}{3(1 - \tilde{\alpha})x} \left[ \frac{1 - (1+x)e^{-x} + \tilde{\alpha}e^{-x}(e^{-x} - 1 + x)}{1 - e^{-x} + \frac{1}{\varepsilon}e^{-x}} \right]. \quad (7)$$

In the limit of small pore size, ( $a \ll v/\omega$ ), we find

$$\tilde{D} \approx \frac{1}{6} \frac{(1 + \tilde{\alpha})}{1 - \tilde{\alpha}} \varepsilon \omega a^2. \quad (8)$$

Hence, accounting for steric inhibition lowers the diffusion constant ( $\varepsilon < 1$  and  $\tilde{\alpha} < \alpha$ ).

In Fig. S2, we show the ratio of the quantity,  $\varepsilon(1 + \tilde{\alpha}) / (1 - \tilde{\alpha})$ , evaluated for the tumble angle distribution of *P. putida* to that evaluated for the tumble angle distribution of *E. coli*. For the same  $\omega$  and  $a$ , the plot demonstrates the relative value of the diffusion constant of cells with these tumble angle distributions in the small pore size limit. We note that in porous environments requiring angles  $\beta$  greater than approximately  $\pi/2$  to clear obstacles, the broader tumble angle distribution of *P. putida* compared to that of *E. coli* allows these cells to diffuse more effectively through the medium.

In closing, we point out three features which our analysis does not treat. First, we note that the escape angle  $\beta$  will have some functional dependence on the mean obstacle size,  $b$ . Together with the porosity of the medium, the obstacle size  $b$  also determines the pore size,  $a$ . Hence, both  $a$  and  $\beta$  depend on the obstacle size and are therefore related. Second, our analysis neglects the finite duration of tumbles, which will serve to reduce the diffusion constant. Third, we assume that when a cell encounters an obstacle, it idles until a tumble with appropriate escape angle allows it to run again. As discussed in Supplementary Section C, it is possible that cells are in fact not completely immobile but rather partially translocate along these obstructions, which would be observable in single cell tracking of cells in a given porous environment. Finally, we note that in a porous medium, geometrical restrictions likely interfere with flagellar unbundling and the resulting cellular reorientation, giving rise to a tumble angle distribution that is modified with respect to that in bulk, which must be measured for a given microarchitecture.

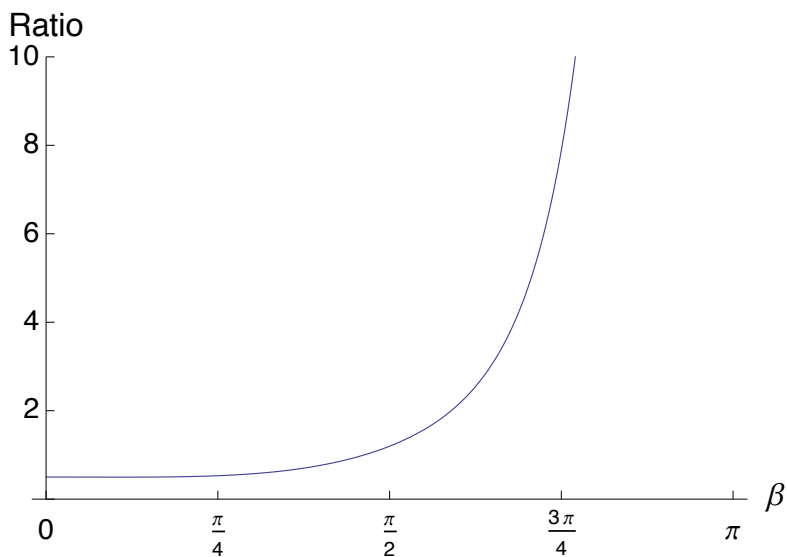

Figure S2: The ratio of the quantity,  $\varepsilon(1 + \tilde{\alpha}) / (1 - \tilde{\alpha})$ , evaluated for the tumble angle distribution of *P. putida* to that evaluated for the tumble angle distribution of *E. coli*, plotted as a function of the escape angle,  $\beta$ .

### Supplementary Section C: Motility Agar Pore Size

To relate swim ring assays with our theoretical results, the average agar pore size is required. Agarose molecules laterally aggregate to form thicker fibers, known as suprafibers typically 5-40 nm in thickness, which branch to form a three-dimensional fluid-filled gelled network with a distribution of effective pore sizes (7). Experimental determination of agar gel structure and pore size has been undertaken primarily using indirect methods based on probe (latex beads, DNA fragments) mobilities in electrophoresis experiments (8), but also using direct atomic force microscopy (AFM) imaging (7, 9, 10), typically for gels in the  $C = 1\% - 5\%$  concentration range. At lower concentrations used in bacterial swimming motility assays ( $C = 0.25\%$  in this work), the network structure has not been quantified due to the softness of the gel.

The final structure of the agarose gel depends on many parameters, such as polymer charge and concentration, strength of the buffer and cooling speed (10, 11). Imaging studies, as well as multiparticle tracking investigations (12), have highlighted the fact that agarose is a structurally heterogeneous network, with a wide pore size distribution. AFM studies of the evolution of agarose gel structure as function of gel and buffer concentrations indicate that gels become more homogeneous with smaller pores as the buffer concentration decreases (10); for a given ionic strength of the buffer solution, the average pore size and spread in the distribution of pore sizes increases as the gel concentration is decreased (9, 10). For Tris-borate-EDTA (TBE) buffer (in which the majority of the agar structural studies have been carried out), varied over a concentration range of 0.001 – 1 M at 1% agarose, the mean pore size varies from approximately 370 to 1800 nm (10). The full-width at half-maximum of the distribution of pore sizes (at 0.01 TBE) increases from approximately 80 nm at  $C = 5\%$  agarose concentration to 500 nm at  $C = 0.7\%$ . Indeed, at the high buffer concentrations pore diameters in the multiple micron range are observed (10). Apparently increasing buffer concentration favors aggregation of the neutral agarose chains, resulting in an open cross-linked network with larger voids.

From the standpoint of bacterial swimming motility in the porous agar environment, we distinguish between various length scales in this network. One length scale is given by the mean separation between fibers forming a mesh, while a second, longer length scale is that of (connected) voids defined by mesh “walls”. Broadening of the distribution of pore sizes at lower agar concentrations is expected to result from the formation of these voids, while at the higher concentrations for which there is more quantification of the agar microarchitecture, the network is described by the tighter distribution of pores defined by mean fiber bundle separations. It has been noted that

different physical techniques and migrating probes of different sizes typically measure different classes of pore sizes (8). Hence, a straight extrapolation from results of previous experiments at higher agar concentrations to determine pore sizes at the lower concentrations of typical swimming motility assays, as we perform below, is likely only approximately valid.

In previous work on AFM analysis of agarose gels (9, 10), the mean distance between fibers as a function of gel concentration  $C$  is found to obey a power law,  $\langle a \rangle \sim C^{-\gamma}$ , where the scaling exponent  $\gamma$  lies between the value 0.5 predicted by the Ogston model for a random array of straight chains (13) and the value 0.75 from the De Gennes model for a network of flexible chains (14). Using the values for pore sizes at high and low TBE buffer concentrations for 1% agarose (10), a simple extrapolation to the concentration in the swim ring assays reported here,  $C = 0.25\%$ , yields mean pore sizes in the range  $740 \text{ nm} < \langle a \rangle < 1050 \text{ nm}$  (at the lowest buffer concentration) and in the range  $3400 \text{ nm} < \langle a \rangle < 4800 \text{ nm}$  (at high buffer concentration) for  $0.5 < \gamma < 0.75$ . One study (11), using absorbance measurements at 700 nm and 800 nm wavelengths to probe agarose gel topology at  $C = 1.5\%$  finds a higher scaling exponent,  $\gamma = 1.6$ , which would result in larger mean pore sizes.

The typical void size characterized by the mean separation between fiber mesh boundaries defines the relevant length scale  $a$  in our theoretical description. At these boundaries, we assume that a running cell, which is larger than mean fiber separation, is immobilized until reorientated by a tumble. However, we note that “grazing” collisions with fibers may not entirely halt the cell, but rather act as “speed bumps” that serve to reduce the effective cell velocity along its run as well as to reorient the run direction. This latter effect is not explicitly treated in the model. Future experiments tracking the motion of individual fluorescently labeled *cms* mutants through agar, analogous to recent works quantifying the motion of carbon nanotubes (15), will allow direct measurement of diffusion constants. A valid question is how micron-sized bacteria navigate through the distribution of pore sizes in the agar matrix, in particular when the pores are comparable to their size. Additionally, fluorescent tagging of flagella will allow investigation of the effect of confinement on flagellar bundling/unbundling and propulsion.

## Supporting References

- [1] Nimmo, J. R., 2004. Porosity and pore size distribution. In D. Hillel, editor, *Encyclopedia of Soils in the Environment* v. 3, Elsevier, London, 295–303.
- [2] Locsei, J. T., 2007. Persistence of direction increases the drift velocity of run and tumble chemotaxis. *J. Math. Biol.* 55:41–60.
- [3] Bubendorfer, S., M. Koltai, F. Rossmann, V. Sourjik, and K. Thormann, 2014. A secondary bacterial flagellar system improve bacterial spreading by increasing the directional persistence of swimming. *Proc. Natl. Acad. Sci. USA* 111:11485–11490.
- [4] Berg, H. C., and L. Turner, 1990. Chemotaxis of bacteria in glass capillary assays. *Biophys. J.* 58:919–930.
- [5] Ford, R. M., and R. W. Harvey, 2007. Role of chemotaxis in the transport of bacteria through saturated porous media. *Adv. Water Resour.* 30:1608–1617.
- [6] Berg, H. C., 1993. *Random Walks in Biology*. Princeton University Press, Princeton, NJ.
- [7] Griess, G. A., K. B. Guiseley, M. M. Miller, R. A. Harris, and P. Serwer, 1998. The formation of small-pore gels by an electrically charged agarose derivative. *J. Struct. Biol.* 123:134–142.
- [8] Stellwagen, N. C., 1998. Apparent pore size of polyacrylamide gels: Comparison of gels cast and run in Tris-acetate-EDTA and Tris-borate-EDTA buffers. *Electrophoresis* 19:1542–1547.
- [9] Pernodet, N., N. Maaloum, and B. Tinland, 1997. Pore size of agarose gels by atomic force microscopy. *Electrophoresis* 18:55–58.
- [10] Maaloum, M., N. Pernodet, and B. Tinland, 1998. Agarose gel structure using atomic force microscopy: Gel concentration and ionic strength effects. *Electrophoresis* 19:1606–1610.
- [11] Narayanan, J., J. Y. Xiong, and X. Y. Liu, 2006. Determination of agarose gel pore size: Absorbance measurements vis a vis other techniques. *J. Phys. Conf. Ser.* 28:83–86.
- [12] Valentine, M. T., P. D. Kaplan, D. Thota, J. C. Crocker, T. Gisler, R. K. Prud’homme, M. Beck, and D. A. Weitz, 2001. Investigating the micro environments of inhomogeneous soft materials with multiple particle tracking. *Phys. Rev. E* 64:061506.
- [13] Ogston, A. G., 1958. The spaces in a uniform random suspension of fibres. *Trans. Faraday Soc.* 54:1754–1757.
- [14] DeGennes, P. G., 1979. *Scaling Concepts in Condensed Matter Physics*. Cornell University Press, Ithaca, NY.
- [15] Fakhri, N., F. C. MacKintosh, B. Lounis, L. Cognet, and M. Pasquali, 2010. Brownian motion of stiff filaments in a crowded environment. *Science* 330:1804–1807.
